# Supplementary material
Source: bioRxiv or medRxiv preprint supplement (https://medrxiv.org/highwire/filestream/75993/field_highwire_adjunct_files/0/2020.04.08.20055095-1.pdf)
Supplement: Supplementary file [file 2020.04.08.20055095-1.pdf]

# Prediction on Covid-19 epidemic for different countries: Focusing on South Asia under various precautionary measures

Abhijit Paul<sup>1</sup>, Samrat Chatterjee<sup>1,\*</sup>, and Nandadulal Bairagi<sup>2,\*</sup>

<sup>1</sup>Complex Analysis Group, Translational Health Science and Technology Institute,  
NCR Biotech Science Cluster, 3rd milestone, Faridabad-Gurgaon Expressway,  
Faridabad-121001, India

<sup>2</sup>Centre for Mathematical Biology and Ecology, Department of Mathematics,  
Jadavpur University, Kolkata-700032, India

\*corresponding authors: nbairagi@yahoo.co.in (NB), samrat.chatterjee@thsti.res.in  
(SC)

## Supplementary Information

In the current study, we have used the country-wise temporal data of confirmed, recovered and death cases till 2nd April, 2020. The data is freely available in GitHub repository[1], along with the feature layers of the dashboard, which are now included in the Esri Living Atla[2]. This is the data repository maintained by the Johns Hopkins University[1, 3]. Our proposed mathematical model of the overall dynamics of COVID-19 epidemic is represented by the following system of non-linear ordinary differential equation:-

$$\begin{aligned}\frac{dS}{dt} &= -\frac{\beta SI}{1 + \alpha I}, \\ \frac{dE}{dt} &= \frac{\beta(1-w)SI}{1 + \alpha I} - \gamma E, \\ \frac{dI}{dt} &= \gamma E - \delta I - \mu I, \\ \frac{dR}{dt} &= \delta I, \\ \frac{dD}{dt} &= \mu I,\end{aligned}\tag{1}$$

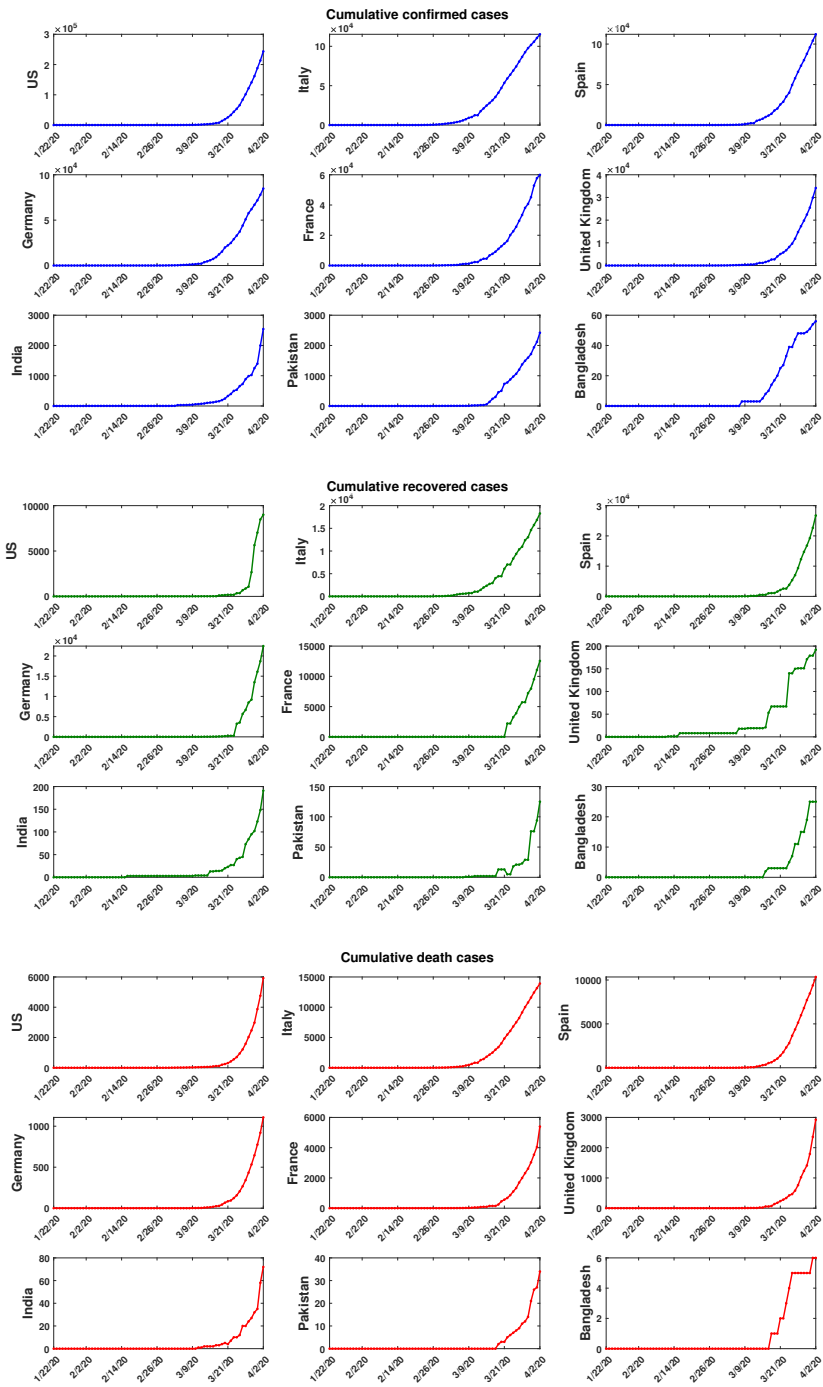

Figure 1: **Available data on COVID-19.** The data from the period of 22nd January, 2020 to 2nd April, 2020. (a) Confirmed cases, (b) Recovered cases, (c) Death cases.

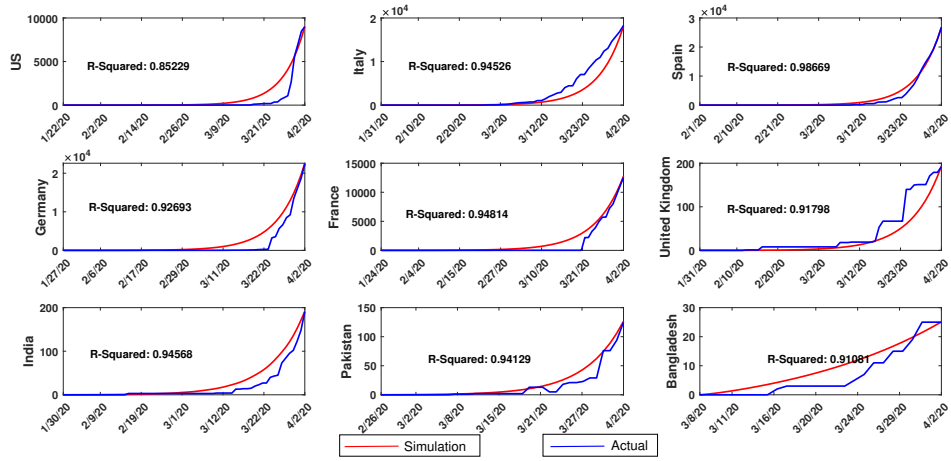

Figure 2: **Cumulative recovered cases:** Comparison of country-specific simulation results of our model (1) with the published data of recovered cases.

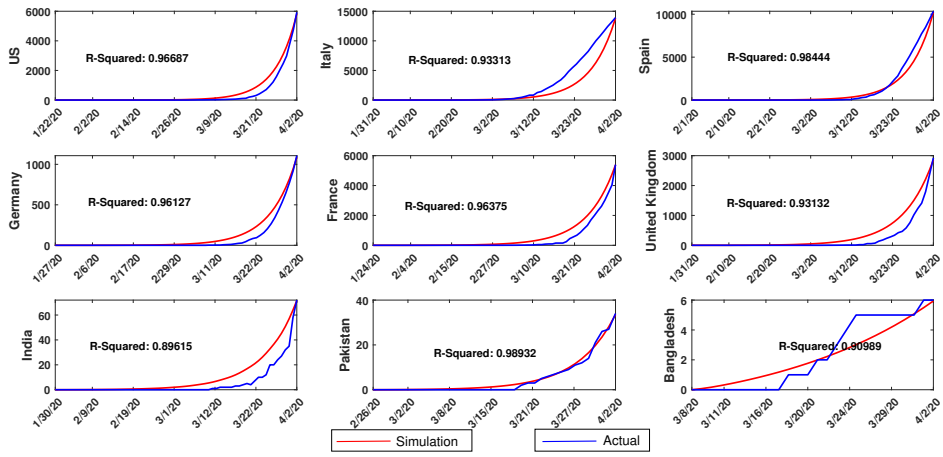

Figure 3: **Cumulative death cases:** Comparison of country-specific simulation results of our proposed model (1) with the published data for death cases. Bangladesh does not show a good curve fit due to lack of sufficient data.

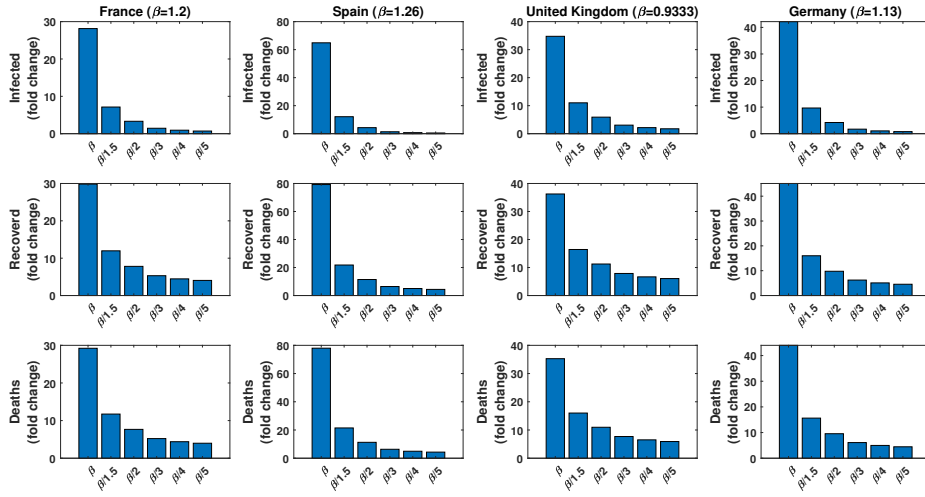

Figure 4: **Effect of parameter variation:** Estimated fold change in the number of infected, recovered and death cases for COVID-19 epidemic in Europe after one month for different values of  $\beta$ . The fold change on 3rd May was calculated on the basis of respective numbers of 2nd April 2020.

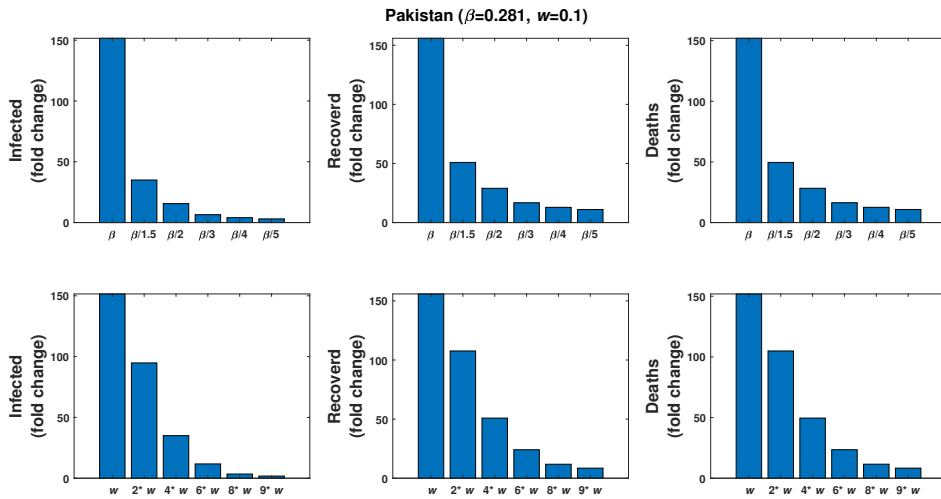

Figure 5: **Effect of parameter variation:** Estimated fold change in the number of infected, recovered and death cases for COVID-19 epidemic in Pakistan after one month for different values of  $\beta$  (upper row) and  $w$  (lower row). The fold change on 3rd May was calculated on the basis of respective numbers of 2nd April 2020.

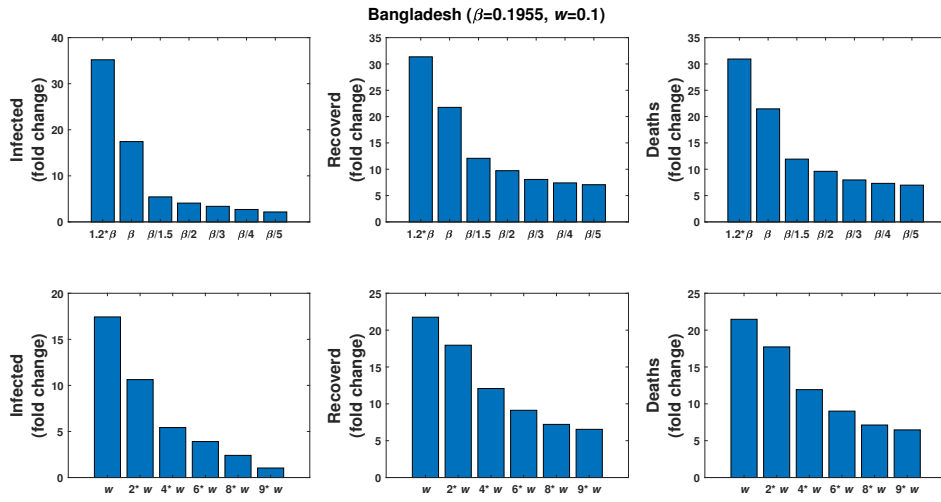

Figure 6: **Effect of parameter variation:** Estimated fold change in the number of infected, recovered and death cases for COVID-19 epidemic in Bangladesh after one month for different values of  $\beta$  (upper row) and  $w$  (lower row). The fold change on 3rd May was calculated on the basis of respective numbers of 2nd April 2020.

## References

- [1] 2019 Novel Coronavirus COVID-19 (2019-nCoV) Data Repository by Johns Hopkins CSSE. <https://github.com/CSSEGISandData/COVID-19>
- [2] Dong, E., Du, H., & Gardner, L. (2020). An interactive web-based dashboard to track COVID-19 in real time. *The Lancet Infectious Diseases*.
- [3] John Hopkins University, "Coronavirus Map," John Hopkins University, 17 March 2020. [Online]. Available: <https://coronavirus.jhu.edu/map.html>.
